# Supplementary material
Source: publisher site journal article supplement (https://www.spandidos-publications.com/1524/downloadSupplementary)

Figure S1. APE1 alteration in various osteosarcoma cell lines. (A) Western blot analysis was used to analyze the expression of APE1 in various osteosarcoma cell lines. (B) The cells were treated with different concentrations of cisplatin for 48 h, and the survival curve scores of various human osteosarcoma lines were obtained by the CCK-8 assay. APE1, apurinic/apyrimidinic endonuclease 1; CDDP, cisplatin.

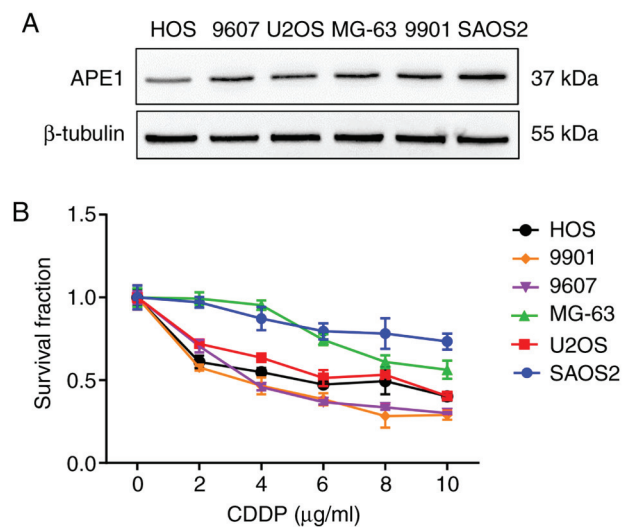

Supplement: Supplementary file 1 [file downloadSupplementary]
